# Supplementary material for: Ecdysone steroid hormone remote controls intestinal stem cell fate decisions via the PPARγ-homolog Eip75B in Drosophila
Source: eLife. 2020 Aug 10;9:e55795. doi: 10.7554/eLife.55795 (PMC7440922; doi:10.7554/eLife.55795)
Supplement: Figure 1—figure supplement 1—source data 1. — Panel H experimental data. [file elife-55795-fig1-figsupp1-data1.xlsx]

## Sheet: Figure 1 - figure  supplement 1
Panel H fluorescence intensity of EcR
Control	>EcR-RNAi GD37059	>EcR-RNAi BL58286
1.12585	0.593828	0.371641
0.694933	0.218703	0.182408
1.16401	0.235332	0.478049
1.44572	0.59554	0.406372
1.13314	0.273236	0.0147565
1.48059	0	0
0.983428	0.134092	0.306681
1.41478	0.329236	0
1.27442	0.210634	0.40973
1.6386	1.13475	0.549654
1.33817	0.130913	0.462184
1.1157	0.335349	0.0927222
1.32824	0.336327	0.527215
1.19653	0.492833	0.568306
1.41471	0.492833	0.0949376
0.981356	0.295489	0.624261
1.31609	0.39624	0.657849
0.917468	0.435366	0.539364
0.770255	0.56375	1.06311
1.22962	0.0599967	0.686934
0.708083	0.27128	0.35742
1.30815	0.142162	0.538363
3.2598	0.333882	0.559016
1.35453	0.347087	0.468616
1.08119	0.456886	0.710016
1.47473	0.351244	0.385933
1.66204	0.154634	0.62812
1.90565	0.900237	0.599821
1.19796	0.433165	0.322689
1.41013	0.348554	0.488339
0.884166	0.274459	0.430955
1.25541	0.123822	0.414804
1.08569	0.116241	0.20792
0.911965	0.752535	0.199559
1.10384	0.0837171	0.51721
0.877949	0	0.304395
0.940551	0.028451	0.202846
1.07133	0.408467	0.328263
0.994076	0.347332	0.461469
0.791194	1.11201	0.347558
1.02959	0.0617085	0.569807
1.10134	0.0384772	0.794914
1.60923	0.281061	0.459325
1.1285	0.346598	0.206062
1.51604	0.895347	0.470045
1.55506	0.477916	0.671784
1.16852	0.394772	0.65449
0.794481	0.440991	0.680145
0.586382	0.52389	0.664566
0.943909	0.144852	0.777834
0.530141	0.884831	0.435243
0.673781	0.232153	0.665066
0.915181	0.172485	0
1.03381	0.456396	0.604323
0.657058	0.290843	0.723451
0.682213	0.340729	0.694795
0.786406	1.31626	1.38019
0.877378	1.51825	0.689149
0.564657	2.17484	0.804847
0.52964	1.96796	0.735671
0.809702	2.18536	0.811493
0.803914	1.34536	0.658492
0.542075	1.69848	0.617615
1.05425	1.9259	0.741889
0.74167	1.76768	0.607682
1.02659	2.5304	0.620545
0.797268	1.93886	0.776477
0.494624	1.04384	1.01859
1.21075	1.58134	0.864376
1.04124	0.619076	0.957992
0.879736	0.427601	0.899321
0.786691	1.7645	0.72288
1.05653	2.15063	0.941698
0.796339	1.87626	0.919902
1.00194	1.73369	1.01695
0.771113	1.26564	1.07226
0.648554	2.17753	1.07419
0.913252	1.16538	1.28536
0.751532	2.37268	0.700583
0.68643	1.73247	1.01831
1.07319	1.71119	0.793771
1.17781	0.772403	0.52793
0.721946	1.68992	0.794985
0.990789	1.75668	0.622117
0.691432	1.18885	0.855371
1.15637	0.844053	0.68286
0.88288	1.38009	0.336195
0.657702	1.42019	0.751822
0.829784	0.693172	0.647201
1.0649	1.21062	0.803418
1.07676	0.850167	0.996724
1.01809	1.09838	0.738744
0.869517	0.975371	0.639483
0.943623	1.37642	0.724452
0.960274	1.08395	0.808206
1.04496	1.19252	0.703442
0.946625	1.97358	0.909611
0.882023	0.428618	0.70923
1.0501	0.612268	0.663494
0.631046	0.658486	0.836505
0.456177	0.595395	0.736386
0.565515	0.0163231	1.02038
0.807344	0.539639	0.93348
0.906677	0.261842	2.61099
0.572661	0.597351	2.38817
0.72309	0.755079	2.18329
0.884238	0.969052	1.98512
0.894957	0.740652	0.352417
0.94491	0.862922	1.06854
0.999078	0.288007	1.97898
0.880665	0.793717	1.10892
0.849078	1.02603	1.18739
0.628831	0.523744	1.2179
0.68793	0.419815	0.509492
0.789479	0.449404	0.745891
0.564053	0.553578	0.43024
1.72171	0.672914	0.610683
1.45124	0.529858	0.623118
1.20573	0.790782	0.541079
0.862636	0.682695	0.420164
2.07971	0.55529	0.64227
0.952872	0.67487	0.512922
0.650864	0.67218	0.619187
1.85131	0.632076	1.16209
1.12307	0.587814	0.66428
1.09446	0.965873	0.556658
1.42924	0.311239	0.721808
2.37169	1.07518	0.432455
1.1935	0.653595	0.840364
1.31283	1.24807	0.894533
0.575791	1.06124	0.969926
0.747702	0.323955	1.01759
1.0145	0.927043	0.500702
0.285521	1.76655	0.672784
0.715179	0.743149	0.945343
1.69358	1.43055	0.885457
2.12935	1.34398	0.856014
1.37324	0.493718	1.18646
2.06944	0.978152	0.880669
2.19025	0.787411	1.47438
1.8474	0.402015	1.31387
1.34389	0.670765	1.33388
2.18071	0.52184	0.912399
1.44684	0.554119	0.911827
1.41701	0.574661	0.959349
1.77893	0.600337	1.57814
2.16873	0.565368	0.526143
1.76401	0.591778	1.06404
1.42655	0.942938	1.40135
0.430778	1.04344	0.908039
1.69627	0.474399	0.903894
1.61356	0.64949	1.12364
1.11616	0.631394	1.18803
1.33405	0.908947	0.765042
1.28392	0.739236	1.15101
1.16972	0.828493	0.986505
1.41035	0.602783	0.922475
0.912217	0.427203	1.05997
0.784811	0.742904	0.699797
1.18292	0.434784	0.743532
1.44189	0.98182	0.740031
1.58544	0.589333	0.944557
0.736881	0.485648	0.878382
1.05185	0.395902	0.765614
1.59057	0.265073	0.620831
1.17339	0.663429	0.996153
1.10394	0.41571	0.760755
1.22352	0.575883	0.684218
0.829807	0.286103	0.91054
0.865999	1.0097	0.354347
1.07484	0.436495	0.572379
0.578908	0.779341	0.509635
1.25237	0.5617	0.652918
0.836409	0.531866	0.626977
0.671589	0.530154	0.603466
0.554454	0.495185	0.682146
0.781143	0.604005	0.492198
1.23452	0.531377	0.197915
0.621703	0.542871	0.583385
0.497966
0.539782
0.991692
0.693353
0.749353
1.00857
0.202561
0.624393
0.823938
0.791659
1.32867
1.26191
1.41328
0.688952
1.12627
1.41116
1.32582
1.10647
1.41557
1.50067
1.18741
1.12627
0.920127
1.03824
1.22116
1.05976
1.22654
0.941647
0.952406
1.0243
1.09864
1.43415
0.911568
1.10109
1.22654
0.988354
0.892249
0.605404
0.674853
0.908878
0.957053
0.791254
0.927952
1.48648
1.21578
0.949716
1.34514
0.863149
0.526662
0.58095
0.633037
0.86177
0.487379
0.617475
0.636793
0.616741
0.156271
0.294192
0.46855
0.342367
0.297127
0.211048
0.443362
0.150647
0.612095
0.236481
0.30593
0.312044
0.358751
0.655134
0.166542
0.882556
0.79819
0.657824
0.627012
0.705509
0.87253
1.51005
0.966433
0.654889
1.34914
0.571501
0.316201
0.288079
0.732653
0.78474
0.804548
0.850766
0.98453
0.810661
0.825578
1.08283
1.19679
