# Supplementary material for: Ecdysone steroid hormone remote controls intestinal stem cell fate decisions via the PPARγ-homolog Eip75B in Drosophila
Source: eLife. 2020 Aug 10;9:e55795. doi: 10.7554/eLife.55795 (PMC7440922; doi:10.7554/eLife.55795)
Supplement: Figure 1—source data 1. — Panel G,H experimental data. [file elife-55795-fig1-data1.xlsx]

## Sheet: Fig.1
Panel G ISC/EB						Panel H progeny
Control VF	Control MF	>EcR-RNAiBL VF	>EcR-RNAiBL MF	>EcR.B2wt VF		Control VF	Control MF	>EcR-RNAiBL MF	>EcR.B2wt VF	>EcR-RNAiBL VF
123.3	135.1	227	277	221.5		0	59.5	13	3.8	13
129.7	146.5	162	169	227.3		0	22.5	6	24.7	6
139.6	136.3	183	207	188.6		0	17.1	4	0	4
105	194.6	231	197	139.6		2.1	18.1	9	3.2	9
203.7	141.9	163	212	126.8		32.1	17	5		5
295.1	284	142	253	166.8		2	60.7	5		5
180.3	260	82	222	121.6		12.5	7.6	16		16
152.1	381	170	129	245.2		0	8.6	5		5
132.9	261	92	249			4.1	53	14		14
142.1	191	159	138			2.2	12	14		14
158.4	252	105	181			19.1	18	6		6
126.5	297	137	156			1.7	7	2		2
103.5	242	110	165			11.7	13	3		3
280	263	154	172				44	5		5
177	336	159	99				7	2		2
257	261	145	164				7	3		3
143	263	198	128				117	3		3
142							56
100							5
274							57
192							13
200
198
196
