# Supplementary material for: Ecdysone steroid hormone remote controls intestinal stem cell fate decisions via the PPARγ-homolog Eip75B in Drosophila
Source: eLife. 2020 Aug 10;9:e55795. doi: 10.7554/eLife.55795 (PMC7440922; doi:10.7554/eLife.55795)
Supplement: Figure 2—figure supplement 1—source data 1. — Panel H,O experimental data. [file elife-55795-fig2-figsupp1-data1.xlsx]

## Sheet: Figure 2 - figure supplement 1
Panel H fluorescence intensity of SREBP>GFP						Panel O
control VF	control MF	>EcR-RNAi VF	>EcR-RNAi MF	+ RH5849 VF		Control	+ MeOH	+ RH5849	>EcI	>EcI-RNAi	>EcR-RNAiBL
9494	26652	10386	6366	17366		11.273	15.22	19.1	144.388	56.807	21.643
13274	31681	10114	2425	29819		19.63	4.065	59.466	96.254	20.892	21.025
10320	11101	11884	10418	16452		18.737	13.534	34.946	42.18	9.638	20.917
9587	13935	8962	6176	12941		15.956	12.54	34.946	31.858	18.413	17.935
9551	12597	8034	6391	12893		15.094	16.996	34.434	20.233	24.788	13.036
9220	12772	7282	10633	14671		18.952	21.427	33.435	34.107	15.435	15.88
9342	20504	7408	4008	23892		11.326	11.262	30.222	32.908	10.142	15.267
7227	12557	9016	9057	24285		20.112	7.968	35.96	12.647	4.277	7.223
365	13299	10501	6592	18801		11.422		52.456	30.933	15.229	12.368
368	13751	8584	9644			20.325		16.095	26.225	19.821	14.197
11270	16146	10361	6667			6.237			4.116	8.176	4.459
6799	26478	9773	4043						29.36	17.022	16.759
	22422	10163	2654						31.24		13.676
	19101		4265						8.694		5.949
	17788		10916						78.328		6.194
			13441						79.055		9.447
			15031						7.182
			9525
