# Supplementary material for: Ecdysone steroid hormone remote controls intestinal stem cell fate decisions via the PPARγ-homolog Eip75B in Drosophila
Source: eLife. 2020 Aug 10;9:e55795. doi: 10.7554/eLife.55795 (PMC7440922; doi:10.7554/eLife.55795)
Supplement: Figure 2—source data 1. — Panel A,B,C,J,O,P,Q experimental data. [file elife-55795-fig2-data1.xlsx]

## Sheet: Fig.2
Panel A 20HE titer			Panel B					Panel C			Panel J qPCR EcRE
								ovoD1			Control	EcRE-lacZ (R5)	EcRE-lacZ (ovaries)
wild-type			wild-type VF	wild-type MF	ovoD1 VF	ovoD1 MF		hemolymph	ovaries		1	1.33484	1.90308
hemolymph	ovaries		96.4572	91.1697	74.3134	107.573		1.39887	1.06098		1	2.50533	1.99769
6.76094	1.66596		327.209	127.866	53.2715	92.7789		1.34057	1.24602		1	1.83613	6.00709
2.65671	1.84778		116.399	163.25	66.5084	80.0193		1.39828	1.30173		ttest	0.0290569	0.0819394
1.31851	1.98562		169.503	189.734	69.0145	83.0344		1.64491
1.2374	3.28052		66.2379	118.607	6.53008	13.363		1.66311
1.66024	0.219569		100.151	228.96	10.1232	12.0636		1.65077
1.62855	0.248429		92.8992	132.763	9.00627	15.6934
1.87912	1.89332		38.1876	55.2788	12.9781	22.6144
2.33139	2.05302		51.3371	47.6765
2.23324	1.86106		25.4228	42.6691				Panel O	EcI mRNA
			31.7398	28.4062				VF	MF
			24.3286	22.9473				1	1.61328
			30.2913	25.419				1	2.14851
			33.554	35.0578				1	2.43964
			9.4099	74.9568				1	0.808508
			27.3458	23.6279				1	0.814131
			53.5596					1	1.22264
								1	1.65481
								1	1.51572
Panel P ISC/EB											Panel Q progeny
Control VF	Control MF	+MeOH VF	+MeOH MF	+ RH5849 VF	+ RH5849 MF	>EcI VF	>EcI MF	>EcI-RNAiBLVF	>EcI-RNAiBLMF		Control VF	Control MF	+MeOH VF	+MeOH MF	+ RH5849 VF	+ RH5849 MF	>EcI VF	>EcI MF	>EcI-RNAiBLVF	>EcI-RNAiBLMF
123.3	135.1	172.1	165.5	277.1	183.1	148.2	235.5	148.2	285.6		0	59.5	1.9	11.1	277.1	565.5	35.4	14.7	5.7	16
129.7	146.5	166.4	186.5	200.3	119	142.5	236.4	142.5	152.2		0	22.5	12.4	9.3	200.3	239.7	10.9	129.8	5.7	13
139.6	136.3	190.8	185.4	168.1	173.5	209.6	199.2	209.6	118.1		0	17.1	7	13.3	168.1	313.7	8.6	117.1	16	13.9
105	194.6		176.6	168.9	188.5	130.5	294.1	130.5	156.3		2.1	18.1		7.6	168.9	515.3	3.5	517.5	5.4	22.1
203.7	141.9		211.5	290.3	274.8	104.6	314.9	104.6	193		32.1	17		96.9	290.3	54.4	7.4	92.7	7.4	25.3
295.1	284		289.1		235.8	166.7	253.5	166.7	214.2		2	60.7		23.7		236.5	31.1	39.6	1.9	21.8
180.3	260		181.5		200.6	186.3	218.3	186.3	208.3		12.5	7.6		3.7		100	34.2	180.7	0	4.2
152.1	381		197.8		266.7	217	129.2	217	158.1		0	8.6		59.2			21.2	62.2	1.1	14.6
132.9	261		156.8		259.5	265.1	198.8	265.1	159.4		4.1			7.5				71.1	2.3	14
142.1	191				154	237.4	176.9	237.4	276.3		2.2							48.5	1.1	71.6
158.4	252				186.5				241.3		19.1									35.5
126.5	297				183.8				191.2		1.7									1.2
103.5	242				250.9				132.9		11.7									1.5
280									142.1											1.4
177									79.1											18.5
257									166.6											3
									151.2											0.5
									130.1											7.9
									79.3											1.1
