# Supplementary material for: Ecdysone steroid hormone remote controls intestinal stem cell fate decisions via the PPARγ-homolog Eip75B in Drosophila
Source: eLife. 2020 Aug 10;9:e55795. doi: 10.7554/eLife.55795 (PMC7440922; doi:10.7554/eLife.55795)
Supplement: Figure 3—figure supplement 1—source data 1. — Panel D,E,F,G experimental data. [file elife-55795-fig3-figsupp1-data1.xlsx]

## Sheet: Fig.S3
Panel D clone size distribution
	1			1<x<5			5<=x<10			10<=x<20			x>=20
Control	57.483			31.2925			8.84354			2.04082			0.340136
E75B A81	48.9655			28.6207			14.8276			5.86207			1.72414
Panel E						Panel F
>w1118	>Eip75B-A	>Eip75B-B	>Eip75B-C	>Eip75B-RNAiGD		>w1118	>Eip75B-A	>Eip75B-B	>Eip75B-C	>Eip75B-RNAiGD
10	2	0	0	0		0	0	8	0	0
1	0	2	0	0		0	1	5	2	0
5	0	1	0	0		1	0	13	0	0
6	0		0	0		0	1	4	0	2
10	0		0	0		5	0	0	0	0
3	0		0	0		0	0	5	0	1
2	0		0	0		0	0	5	0	1
3	0		0	0		0	0		0	0
6	1		0	0		0	0		2	1
			0	0			1		0	0
							1
Panel G
Control	>Eip75B-A	>Eip75B-B	>Eip75B-C	>Eip75B-RNAiGD	>N-RNAi
6336	5348	5327	5550	4663	3992
5969	4757	7168	4512	6065	3860
5822	5270	6291	5669	5035	4232
6421	5473	5196	5614	4964	4088
7320	5145	5685	4225	5209	4332
6325	4333	4045	4938	5093	3844
6313	4931	5725	4370	5110	4488
5729	5415	5214	5385	5137	4284
5847	5535	4724	5127	5579	3884
6158	5011	5428	5316	5679
6224		5475	4043
6421		5464	4547
5744		5302	4584
6860			5544
			5664
			4481
