# Supplementary material for: Ecdysone steroid hormone remote controls intestinal stem cell fate decisions via the PPARγ-homolog Eip75B in Drosophila
Source: eLife. 2020 Aug 10;9:e55795. doi: 10.7554/eLife.55795 (PMC7440922; doi:10.7554/eLife.55795)
Supplement: Figure 3—figure supplement 2—source data 1. — Panel A,J,K,L experimental data. [file elife-55795-fig3-figsupp2-data1.xlsx]

## Sheet: Figure 3 - figure supplement 2
Panel A new EE
Control	>E75B-A	>E75B-B	>E75B-C	>E75B-RNAiGD
10	2	0	0	0
1	0	2	0	0
5	0	1	0	0
6	0		0	0
10	0		0	0
3	0		0	0
2	0		0	0
3	0		0	0
6	1		0	0
			0	0
Panel J EB
Control VF	Control MF	>E75B-A (VF)	>E75B-A (MF)	>E75B-B (VF)	>E75B-B (MF)	>E75B-C (VF)	>E75B-C (MF)	>E75B-RNAiGD (VF)	>E75B-RNAiGD (MF)
280	284	33.8755	83	172.829	14.0453	14.8498	small n	424	384.718
177	260	34.0005	30	436.22	422.603	31.0426		267.43	317.062
257	381	67.7583	0	172.829	352.247	25.2969		312.045	276.094
143	261	51.5091	28	285.892	549.954	3.08176		420.921	324.71
142	132	20.7393	0	176.437	482.377	83.8268		372.969	135.033
100	191	44.5219	29	355.474	272.916	115.178		264.333	415.243
274	252	120.666	8	311.1	416.208			287.843	174.451
192	297	54.7858	9	121.578	359.98			287.801	211.238
200	242	13.0919	6	154.112	232.879			195.113	431.963
198	263	27.5649	42	180.811	272.324			302.072	292.132
196	336
	261
	263
Panel K progeny
Control VF	Control MF	>E75B-A (VF)	>E75B-A (MF)	>E75B-B (VF)	>E75B-B (MF)	>E75B-C (VF)	>E75B-C (MF)	>E75B-RNAiGD (VF)	>E75B-RNAiGD (MF)
30	28	306.493	136	159.488	310.474	223.737	small n	15.3444	97.7941
88	49	184.427	55	212.804	129.239	273.705		12.3429	39.6955
41	119	223.668	194	167.352	231.946	140.676		13.3533	25.0994
41	34	356.387	179	112.872	255.912	125.582		48.0864	18.208
52	112	162.056	125	186.323	210.638	375.224		43.3069	6.40669
35	52	216.637	167	199.247	102.26	247.401		107.357	139.777
18	193	164.595	185	160.411	462.813			47.0588	16.3958
9	79	303.034	103	17.9218	152.104			16.4458	18.4515
5	83	161.326	196	194.951	204.397			116.238	83.8587
10	33	175.413	184	34.5577	131.816			65.7402	15.6101
33	35
	17
	70
Panel L pH3
Control VF	Control MF	>E75B-A (VF)	>E75B-A (MF)	>E75B-B (VF)	>E75B-B (MF)	>E75B-C (VF)	>E75B-C (MF)	>E75B-RNAiGD (VF)	>E75B-RNAiGD (MF)
0	0	0	0	9	3	0	small n	0	1
0	1	0	0	4	1	0		0	0
0	1	0	0	4	3	0		0	1
0	0	0	0	0	2	7		0	3
0	0	2	0	0	7	2		0	1
0	0	4	0		2	1		0	3
		0	0		0			0	2
		0	0		0			0	3
		0	0		2			0	4
		0	2					0	3
		0	0						0
