# Supplementary material for: Ecdysone steroid hormone remote controls intestinal stem cell fate decisions via the PPARγ-homolog Eip75B in Drosophila
Source: eLife. 2020 Aug 10;9:e55795. doi: 10.7554/eLife.55795 (PMC7440922; doi:10.7554/eLife.55795)
Supplement: Figure 3—source data 1. — Panel C,L,M experimental data. [file elife-55795-fig3-data1.xlsx]

## Sheet: Fig.3
Panel C qPCR
Control	Kr-h1	E74A	E75B-A	E75B-B	E75B-C	EcR.A
1	2.53222	1.42348	3.14016	1.01739	3.06908	1.20281
1	3.03198	1.41606	6.0765	2.88093	4.99962	2.81942
1	1.43333	0.802372	0.59029	1.11754	1.49968	1.408
1	1.89		6.25	0.58	3.59
1			2.84	0.9	2.4
1			2.5	0.9	0.8
Panel L ISC/EB
Control VF	Control MF	>Eip75B-A (VF)	>Eip75B-A (MF)	>Eip75B-B (VF)	>Eip75B-B (MF)	>Eip75B-C (VF)	>Eip75B-C (MF)	>Eip75B-RNAiGD (VF)	>Eip75B-RNAiGD (MF)	>Eip75B-RNAiGD + RH5849 (MF)	>Eip75B-A;>EcI-RNAi (MF)	>Eip75B-C;>EcI-RNAi (MF)
258.71	180.098	0	31.2825		288.832	49.1772	1.83542	647.484	371.852	147.799	0.65554	0
168.534	342.543	68.8141	35.0048		340.383	56.3072	11.4129	431.861	246.75	156.011	1.10761	0
169.808	554.621	69.6944	26.0753	409.217	360.672	28.3972	1.08277	494.086	466.636	133.527	8.4085	1.4534
225.794	306.997	49.6875	48.6892	359.019	586.113	29.2797	1.88365	526.466	486.687	79.9452	8.78778	3.83766
173.604	632.329	22.2538	2.62089	682.523	358.709	22.3279	2.84269	496.615	406.31	120.776	5.4798	4.91927
284.442	286.755	58.2348	11.4093	630.593	666.885	57.7123	11.9772	385.026	466.478	178.345		1.35296
298.125	785.972	4.54116	5.03757	524.476	715.426	9.64311	2.69844	323.366	534.412	189.886		1.90728
376.053	444.893	2.40131	4.52332	254.38	414.689	2.97508	0	535.932	495.943	185.376		5.51019
254.77	555.263	4.40525	5.9113	247.952	370.913	9.74951	3.35694	452.047	479.029	97.4272		0.686873
187.302	301.783	3.14498	0.766536	479.349	288.423	3.54139	4.76021	524.713	519.811	62.5245		0
160.02	561.07	0	19.2793		460.547				495.43	90.9641		0.718484
208.061	342.255		13.2728						513.949
	278.352		0.970912
			1.97883
Panel M progeny
Control VF	Control MF	>Eip75B-A (VF)	>Eip75B-A (MF)	>Eip75B-B (VF)	>Eip75B-B (MF)	>Eip75B-C (VF)	>Eip75B-C (MF)	>Eip75B-RNAiGD (VF)	>Eip75B-RNAiGD (MF)	>Eip75B-RNAiGD + RH5849 (MF)	>Eip75B-A;>EcI-RNAi (MF)	>Eip75B-C;>EcI-RNAi (MF)
97.9674	251.983	360.29	222.378	572.904	573.888	347.078	201.896	61.4214	29.6353	27.5557	68	193
1.98275	106.913	316.545	142.207	224.286	777.906	210.213	283.421	54.2539	27.7948	57.4777	97	133
72.0974	85.726	346.94	216.135	22.2831	306.882	313.721	174.325	71.9605	39.9973	97.9195	226	211
128.902	306.086	560.946	329.463	197.716	122.545	658.794	197.783	79.2949	88.5715	40.4118	160	246
17.2279	388.779	415.148	353.82	141.331	239.988	562.081	250.156	112.658	105.107	57.872	172	135
50.1957	280.366	697.604	418.884	67.0178	384.133	172.542	350.606	101.207	105.133	65.7584		91
66.1592	136.651	256.122	310.65	33.7159	246.234	156.218	213.177	18.4342	52.3436	201.345		160
35.5541	390.591	401.018	248.029	41.7195	81.5621	345.11	352.426	48.1994	79.5703	199.705		127
137.053	165.79	176.944	139.655		58.6062	213.739	150.223	18.6524	114.154	32.9754		248
94.3604	245.334	393.908	182.436		15.3094	91.1908	232.457	63.782	42.871	42.3553		135
112.014	139.882	183.975	256.765		443.141				13.1364	39.2582		190
48.6023	207.328		275.934						30.5833
	134.138		270.884
			256.258
