# Supplementary material for: Ecdysone steroid hormone remote controls intestinal stem cell fate decisions via the PPARγ-homolog Eip75B in Drosophila
Source: eLife. 2020 Aug 10;9:e55795. doi: 10.7554/eLife.55795 (PMC7440922; doi:10.7554/eLife.55795)
Supplement: Figure 4—source data 1. — Panel E,F experimental data. [file elife-55795-fig4-data1.xlsx]

## Sheet: Fig.4
Panel E ISC/EB						Panel F
Control DMSO	Control Pioglitazone	>Eip75B-RNAi DMSO	>Eip75B-RNAi Pioglitazone			Control DMSO	Control Pioglitazone	>Eip75B-RNAi DMSO	>Eip75B-RNAi Pioglitazone
226	648	306	235			140	738	19	21
209	617	183	196			44	396	39	10
186	663	185	222			122	407	66	1
272	316	250	346			86	241	52	45
229	262	139	240			26	201	2	7
256	396	174	271			133	245	5	3
234		287	180			115		10	7
		243	328					58	9
		256	446					1	46
		171	335					4	4
			304						17
