# Supplementary material for: Ecdysone steroid hormone remote controls intestinal stem cell fate decisions via the PPARγ-homolog Eip75B in Drosophila
Source: eLife. 2020 Aug 10;9:e55795. doi: 10.7554/eLife.55795 (PMC7440922; doi:10.7554/eLife.55795)
Supplement: Figure 5—source data 1. — Panel I,J experimental data. [file elife-55795-fig5-data1.xlsx]

## Sheet: Fig.5
Panel I ISC/EB
Control (VF)	>Kr-h1 (VF)	>Eip75B-A;>Kr-h1 (VF)	>Eip75B-B;>Kr-h1 (VF)	>Eip75B-C;>Kr-h1 (VF)	>Eip75B-RNAi;>Kr-h1 (VF)	Control (MF)	Eip75B-RNAi;>Kr-h1-RNAi (MF)	>Eip75B-RNAi;>Kr-h1 (MF)
252	440	2	701	2	313	299	187	360
223	478	6	1135	5	280	307	202	385
237	471	8	964	9	353	266	172	293
200	406	3	589	12	344	201	179	303
202	550	5	463	1	348	255	153	332
152		4	558	7	410	263	196	376
132.9		12	603	9	284	245	172	282
142.1		6	504		299	257	162	313
156		7			328			351
126.5					278			389
103.5					308			368
221					275			405
					267			391
Panel J progeny
Control (VF)	>Kr-h1 (VF)	>Eip75B-A;>Kr-h1 (VF)	>Eip75B-B;>Kr-h1 (VF)	>Eip75B-C;>Kr-h1 (VF)	>Eip75B-RNAi;>Kr-h1 (VF)	Control (MF)	Eip75B-RNAi;>Kr-h1-RNAi (MF)	>Eip75B-RNAi;>Kr-h1 (MF)
3	5	347	5	347	3	60	9	11
11	4	368	8	327	6	38	7	11
8	11	289	2	297	7	33	0	1
3	2	301	3	301	0	45	2	22
9	6	334	11	234	3	90	11	16
		309	8	315	3	30	5	3
		365	9	299	6	99	5	7
		268	17		3	68	1	7
		255	4		2			17
			9		4			1
					17			13
					1			25
					0			15
