# Supplementary material for: Ecdysone steroid hormone remote controls intestinal stem cell fate decisions via the PPARγ-homolog Eip75B in Drosophila
Source: eLife. 2020 Aug 10;9:e55795. doi: 10.7554/eLife.55795 (PMC7440922; doi:10.7554/eLife.55795)
Supplement: Figure 6—figure supplement 1—source data 1. — Panel A experimental data. [file elife-55795-fig6-figsupp1-data1.xlsx]

## Sheet: Figure 6 - figure supplement 1
Panel A Notch tumor size distribution
class i				class ii				class iii				class iv
>N-RNAi	>E75B-A; >N-RNAi	>E75B-B; >N-RNAi	>E75B-C; >N-RNAi	>N-RNAi	>E75B-A; >N-RNAi	>E75B-B; >N-RNAi	>E75B-C; >N-RNAi	>N-RNAi	>E75B-A; >N-RNAi	>E75B-B; >N-RNAi	>E75B-C; >N-RNAi	>N-RNAi	>E75B-A; >N-RNAi	>E75B-B; >N-RNAi	>E75B-C; >N-RNAi
16	1	0	0	2	0	0	0	5	1	0	0	0	0	2	0
20	1	0	1	7	1	0	1	2	3	0	1	0	0	0	0
21	4	7	0	3	2	0	0	5	0	0	0	0	0	0	0
8	0	2	0	1	0	0	0	0	7	0	0	0	1	0	0
26	4	1	0	5	0	0	0	2	4	1	1	1	0	0	0
19	2	6	0	2	0	1	0	4	1	0	0	0	0	0	0
31	0		2	4	1		0	15	3		0	1	0		0
8	0	8	1	5	2	1	0	1	3	1	0	0	1	0	0
11	1	1	3	2	1	0	0	2	1	0	3	0	0	0	1
20	1	0	2	7	0	0	0	2	0	0	0	1		0	0
