# Supplementary material for: Ecdysone steroid hormone remote controls intestinal stem cell fate decisions via the PPARγ-homolog Eip75B in Drosophila
Source: eLife. 2020 Aug 10;9:e55795. doi: 10.7554/eLife.55795 (PMC7440922; doi:10.7554/eLife.55795)
Supplement: Figure 6—source data 1. — Panel F,I,J experimental data. [file elife-55795-fig6-data1.xlsx]

## Sheet: Fig.6
Panel F number of N-tumors
>N-RNAi	>E75B-A; >N-RNAi	>E75B-C; >N-RNAi
23	2	0
29	5	3
29	6	0
9	8	0
34	8	1
25	3	0
51	4	2
14	6	1
15	3	7
30	1	2
Panel I new EC			Panel J number of Notch tumors
DMSO	Pioglitazone		DMSO	Pioglitazone
77	78		19	15
17	62		14	8
11	98		20	23
38	69		14	10
23	80		20	16
