# Supplementary material for: Ecdysone steroid hormone remote controls intestinal stem cell fate decisions via the PPARγ-homolog Eip75B in Drosophila
Source: eLife. 2020 Aug 10;9:e55795. doi: 10.7554/eLife.55795 (PMC7440922; doi:10.7554/eLife.55795)
Supplement: Figure 7—figure supplement 1—source data 1. — Panel C,G experimental data. [file elife-55795-fig7-figsupp1-data1.xlsx]

## Sheet: Figure 7 Figure supplement 1
Panel C			Panel G
MeOH	RH5849		+ MeOH	+ RH5849
0	17		27.514	51.986
0	11		24.718	49.998
0	16		19.29	52.759
2	33		50.553	74.933
4	10		45.735	82.31
5	7		34.263	132.16
0			17.477	66.828
			23.512	40.484
			83.22	15.994
			55.809	57.708
			64.121	143.211
			45.26	71.699
			73.033	74.011
			18.631	46.129
			10.42	140.731
			55.788	9.605
			79.296	15.833
			19.952	47.973
			28.89	81.084
			14.677	85.847
			46.43	71.382
			78.353	113.944
			47.434	99.644
			116.983	118.396
			84.562	9.906
			45.704	70.125
			35.344	23.173
			64.058	102.441
			61.393	74.5
			59.676	45.957
			18.097	94.403
			11.018	96.418
			22.016	148.295
			22.877	9.019
			23.219	158.234
			30.599	61.916
			18.091	121.939
			32.328	149.005
			49.786	23.309
			34.273	82.679
			57.564	97.634
			59.279	63.238
			22.907	24.4
			64.473	101.758
			21.391	87.623
			34.558	32.188
			46.702	140.134
			31.024	47.311
			19.444	38.412
			19.262	36.694
			26.608	37.052
			18.016	33.911
			31.497	34.04
			49.229	33.796
			49.157	109.922
			40.844	59.367
			56.444	71.928
			101.561	53.149
			25.171	80.755
			21.44	104.037
			68.542	17.182
			26.833	121.802
			61.377	73.174
			68.231	37.532
			60.719	46.476
			82.51	67.874
			102.843	56.611
			26.785	96.486
			51.566	92.333
			26.714	104.418
			53.237	59.516
			41.319	37.547
			64.569	37.784
			45.9	101.515
			84.302	25.536
			60.02	108.72
			33.96	65.707
			20.971	18.938
			70.784	19.295
			32.218	105.149
			19.104	129.252
			48.39	80.946
			84.126	75.841
			56.69	73.614
			33.571	39.037
			22.717	21.583
			31.07	100.098
			44.462	68.132
			29.536	42.924
			22.816	37.351
			37.928	125.153
			29.536	77.896
			68.173	140.007
			22.215	109.624
			84.317	98.918
			120.162	59.554
			23.298	54.333
			15.757	146.013
			142.444	21.678
			58.41	15.847
			85.552	139.311
			47.908	67.556
			30.477	19.237
			81.222	35.184
			48.635	75.704
			60.114	89.793
			74.515	28.423
			32.301	26.271
			49.244	91.118
			8.881	17.945
			10.972	127.366
			7.474	66.823
			134.346	31.024
			123.183	34.107
			72.651	97.983
			89.663	136.4
			103.298	68.88
			53.818	89.02
			116.437	83.12
			43.721	114.76
			62.566	112.448
			145.512	38.248
			65.254	32.198
			49.848	28.12
			75.599	60.859
			41.545	118.312
			54.216	12.222
			71.756	51.275
			56.783	16.286
			74.708	107.734
			100.919	81.204
			72.441	68.898
			98.131	96.06
			80.316	64.092
			76.562	62.412
			103.35	102.412
			106.664	56.607
			109.4	87.503
			121.878	61.19
			72.318	75.579
			44.477	59.924
			41.907	26.583
			87.726	28.665
			94.6	90.684
			56.397	72.507
			100.834	66.551
			63.934	71.062
			40.178	49.871
			51.818	72.621
			64.629	67.368
			53.158	53.995
			58.179	147.482
			51.097	24.889
			28.577	76.936
			59.385	26.704
			37.741	34.624
			32.142	77.715
			45.681	105.035
			67.961	74.794
			46.469	51.814
			37.856	37.117
			45.758	38.619
			29.96	31.669
			51.746	21.918
			62.013	52.213
			51.792	75.166
			48.415	104.778
			51.801	33.682
			107.124	74.795
			44.481	37.929
			108.398	45.268
			15.992	30.555
			72.028	93.17
			62.256	39.726
			31.477	90.168
			11.433	59.769
			83.676	48.347
			27.549	74.9
			15.991	22.66
			54	26.567
			107.799	26.615
			21.186	24.449
			11.358	33.514
			7.365	23.976
			31.929	20.664
			110.368	18.596
			59.05	32.799
			23.115	31.288
			98.379	27.637
			18.85	27.196
			19.308	28.848
			70.856	24.599
			66.489	33.397
			59.484	30.187
			125.685	24.349
			28.953	32.153
			34.658	37.503
			39.642	33.582
			72.487	23.473
			79.197	34.362
			49.193	28.914
			129.767	25.395
			72.19	31.644
			55.713	25.789
			59.268	26.469
			35.019	25.873
			51.637	24.163
			65.706	27.461
			64.279	27.61
			113.46	29.006
			73.159	28.162
			59.79	33.699
			34.088	27.743
			88.207	27.741
			85.102	44.049
			113.09	33.086
			79.991	29.542
			87.074	22.332
			98.849	27.786
			21.817	29.735
			77.175	39.824
			61.913	28.021
			84.696	37.801
			17.607	27.09
			73.42	32.163
			101.252	26.622
			47.118	30.012
			53.43	25.498
			59.467	33.748
			74.944	32.521
			76.501	23.303
			7.591	47.727
			8.025	23.94
			79.249	25.312
			65.426	25.49
			75.233	30.03
			66.741	24.776
			60.406	24.839
			56.914	29.106
			89.401	35.774
			33.527	33.166
			54.902	47.788
			24.36	26.817
			28.466	33.958
			68.324	18.717
			44.191	30.572
			59.645	24.94
			50.357	24.827
			15.348	25.164
			7.146	22.61
			13.55	28.271
			93.49	33
			36.557	21.657
			77.191	23.108
			10.319	19.725
			78.206	29.549
			53.98	31.382
			92.254	30.685
			95.432	18.909
			12.536	21.709
			136.015	21.857
			8.937	26.243
			64.383	25.526
			60.6	28.463
			82.864	22.112
			66.472	29.576
			35.795	27.414
			65.464	21.493
			78.341	20.863
			59.298	22.121
			14.628	35.531
			32.816	24.962
			78.416	34.473
			27.888	36.804
			34.583	30.404
			27.946	29.499
			16.48	28.013
			25.459	27.392
			61.355	22.746
			46.833	24.658
			28.87	77.259
			101.146	88.368
			15.37	102.752
			34.973	70.507
			32.701	77.924
			54.941	82.884
			51.003	110.181
			55.11	127.247
			50.713	31.383
			36.766	62.075
			13.032	65.17
			5.295	69.49
			49.425	84.304
			9.435	75.459
			36.793	101.911
				100.739
				77.181
				71.009
				85.992
				64.898
				71.653
				101.361
				130.748
				62.08
				109.891
				132.325
				95.261
				90.45
				104.979
				82.835
				102.717
				90.062
				119.402
				51.586
				87.637
				98.32
				93.544
				50.146
				95.627
				102.635
				119.412
				76.992
				68.648
				77.605
				72.971
				80.769
				109.593
				78.456
				71.735
				82.023
				71.301
				71.356
				61.542
				66.761
				66.355
				82.384
				84.554
				44.29
				120.893
				49.094
				66.493
				150.87
				155.46
				96.352
				101.828
				90.989
				146.349
				117.286
				106.445
				117.488
				126.057
				134.466
				99.514
				35.022
				150.904
				52.659
				12.862
				126.493
				113.145
				138.258
				95.974
				97.687
				154.467
				121.798
				55.551
				49.157
				97.086
				123.277
				79.411
				83.4
				65.652
				90.218
				20.905
				116.114
				153.073
				78.272
				47.522
				140.881
				101.393
				65.165
				138.436
				83.049
				143.749
				72.217
				148.099
				104.188
				141.038
				114.307
				141.429
				95.5
				92.302
				149.975
				35.052
				50.874
				105.637
				128.22
				59.34
				133.095
				119.492
				106.157
				9.876
				9.121
				102.183
				124.765
				29.618
				97.735
				93.651
				127.173
				83.651
				105.881
				123.251
				129.207
				152.782
				12.795
				31.534
				56.893
				52.635
				75.257
				49.314
				57.533
				99.028
				43.725
				36.8
				109.118
				9.796
				45.341
				44.757
				91.634
				131.657
				62.427
				83.415
				81.641
				61.404
				125.64
				86.635
				106.607
				55.367
				88.633
				82.397
				93.859
				94.353
				167.78
				95.357
				83.572
				97.109
				68.383
				43.021
				9.39
				62.224
				38.052
				9.471
				86.086
				126.632
				83.592
				19.799
				78.515
				46.649
				65.654
				32.112
				54.843
				44.328
				72.838
				59.07
				83.326
				122.117
				139.797
				104.77
