# Supplementary material for: Ecdysone steroid hormone remote controls intestinal stem cell fate decisions via the PPARγ-homolog Eip75B in Drosophila
Source: eLife. 2020 Aug 10;9:e55795. doi: 10.7554/eLife.55795 (PMC7440922; doi:10.7554/eLife.55795)
Supplement: Figure 7—source data 1. — Panel F,G experimental data. [file elife-55795-fig7-data1.xlsx]

## Sheet: Fig.7
Panel F number of N-tumors
>N-RNAi	>N DN	>N DN + RH5849	>N-RNAi;>EcI	>N DN;>EcI-RNAi	>N-RNAi;>EcR-RNAi
23	56	confluence	confluence	8	3
29	43			2	5
29	34			3	17
9	37			6	22
34	22			11	3
25	29			14	5
51				12	13
14				9
15				9
30
16
20
21
8
26
19
31
8
11
20
Panel G new EC
>N-RNAi	>N DN	>N DN + RH5849	>N-RNAi;>EcI	>N DN;>EcI-RNAi	>N-RNAi;>EcR-RNAi
0	6	22	52	8	3
13	3	19	35	18	5
14	9	27	38	17	2
8	14	56	53	9	14
4		23	45	9	0
6		37		2	3
0				3	5
1				6
0				11
0
3
5
4
